# Supplementary material for: Multiplexed Targeted Spatial Mass Spectrometry Imaging Assays to monitor lipids and NAD+ metabolites in male CD38 knockout mice exhibiting improved metabolism
Source: bioRxiv preprint, doi:10.1101/2025.05.25.655991, version 3 (2026-01-15)
Supplement: Supplementary Table 2 [file 655991_file18.xlsx]

## Sheet: Supplemental_Table_2A
Supplemental Table 2: Quantification and Statistical Analysis of ADPR Fragment Ion at m/z 346.06
Statistical analysis for the ADPR fragment ion at m/z 346.06 from the ADPR precursor ion [M-H]- at m/z 558.06 & Vs/cm2 1.0045–1.0233
	WT_676	WT_677	WT_678		CD38-/-_548	CD38-/-_553	CD38-/-_554
Mean Pixel Intensity Value (area normalized):	285.863	394.338	391.022		25.5482	110.379	52.8436
Average:	357.075				62.9235
Standard error of the mean:	35.6186				25.0017
Fold-change CD38-/- vs WT:	0.176219
Student's t-test p-value	0.0025

## Sheet: Supplemental_Table_2B
Supplemental Table 2: Quantification and Statistical Analysis of ADPR Fragment Ion at m/z 346.06
Quantification of the ADPR fragment ion at m/z 346.06 from the ADPR precursor ion [M-H]- at m/z 558.06 & Vs/cm2 1.0045–1.0233
	WT_676	WT_677	WT_678		CD38-/-_548	CD38-/-_553	CD38-/-_554
Mean Pixel Intensity Value (area normalized):	285.863	394.338	391.022		25.5482	110.379	52.8436
Individual Pixel Values:	0	606.077	556.872		0	195.437	0
	0	62.1987	485.906		512.927	166.369	0
	0	115.885	697.049		0	0	0
	551.872	0	146.035		0	0	0
	0	429.318	474.183		0	0	0
	0	229.429	709.879		0	0	1180.14
	0	101.062	455.382		0	0	556.324
	391.895	307.867	106.388		0	0	251.304
	0	208.102	248.438		0	0	0
	388.038	237.944	514.729		0	190.013	0
	466.136	0	676.8		0	0	0
	0	370.523	269.862		0	0	286.498
	0	0	958.643		0	0	232
	516.038	821.623	306.989		0	0	462.647
	0	129.337	513.942		0	0	198.306
	1317.56	208.414	559.622		0	0	0
	0	0	577.068		0	158.07	0
	608.181	0	304.312		0	0	0
	911.091	0	491.631		0	0	432.776
	0	0	683.535		0	0	0
	1648.54	0	204.488		395.788	0	438.181
	0	430.302	989.861		0	0	0
	0	0	934.562		0	235.636	0
	0	0	503.663		0	0	253.824
	0	341.357	490.454		0	0	0
	0	0	1594.68		0	0	0
	0	0	301.074		0	0	0
	0	0	612.837		0	0	0
	0	0	1184.28		0	613.083	1027.01
	0	0	0		0	0	0
	0	391.134	875.082		0	0	0
	0	0	750.879		0	0	0
	843.971	260.656	580.429		0	724.903	0
	472.417	0	286.409		0	0	0
	0	119.102	1164.55		0	0	0
	0	0	0		0	0	0
	0	207.038	297.439		0	0	0
	0	0	558.047		0	0	0
	1021.79	0	684.344		0	0	0
	0	0	1017.06		0	159.178	0
	548.298	0	468.263		485.281	0	0
	0	0	553.885		0	0	0
	0	973.822	692.094		0	0	0
	0	0	655.816		324.14	0	0
	0	0	336.993		0	0	0
	0	388.722	0		0	0	0
	0	0	0		0	0	0
	450.91	216	1297.9		158.078	0	0
	0	0	1019.58		0	0	0
	0	480.854	626.512		0	0	0
	0	430.365	988.564		0	0	0
	0	665.883	622.014		571.128	0	1212.5
	0	0	356.923		0	0	0
	0	0	442.611		0	0	0
	0	0	435.863		0	0	0
	0	0	503.516		0	0	0
	0	0	744.141		0	534.118	0
	0	608.525	0		0	0	0
	0	0	208.473		0	0	0
	0	0	200.428		0	0	965.258
	1441.99	0	596.829		0	0	0
	0	1235.52	493.064		0	0	0
	0	376.188	114.074		730.353	0	0
	0	0	0		0	0	0
	612.206	0	126.09		0	0	0
	556.29	0	363.855		0	0	0
	0	0	326.867		0	0	0
	657.545	0	0		0	156.45	0
	0	0	922.436		0	0	0
	0	0	218.828		480.294	359.985	0
	668.991	0	0		0	0	0
	0	0	291.992		0	0	0
	0	0	941.44		0	0	0
	0	576.981	398.14		0	0	0
	0	0	148.768		0	0	0
	831.971	0	1199.27		309.086	0	0
	0	0	0		0	0	0
	0	0	844.418		0	0	0
	0	1000	521.933		0	0	0
	0	1701.18	426.858		0	0	0
	0	0	779.516		0	0	0
	0	1151.31	0		0	0	0
	0	504.651	624.861		0	0	0
	0	1409.75	859.706		400.98	0	0
	0	1029.09	0		0	0	0
	0	700.347	335.019		0	0	0
	0	955.902	1149.77		0	0	0
	0	1163.43	0		0	0	0
	888.32	833.276	932.119		0	0	0
	582.955	1159.64	0		0	0	0
	0	1101.79	1034		0	0	0
	0	1146.87	964.641		0	0	0
	0	0	514.253		0	412.07	0
	0	974.188	1034.38		0	0	0
	0	2436.01	1233.57		0	0	0
	0	1313.56	597.087		0	0	955.239
	0	1290.31	1426.24		0	0	0
	0	1976.12	470.191		0	0	0
	0	0	119.407		0	0	0
	0	564.096	599.597		0	577.157	0
	0	1073.1	465.368		0	0	0
	0	1019.78	523.007		0	0	732.559
	0	1657.53	1055.39		0	0	0
	0	2296.55	640.67		0	977.504	0
	0	0	288.679		0	0	0
	0	886.27	986.779		0	0	0
	0	1003.62	258.507		0	0	0
	0	1087.04	662.705		0	0	52.6463
	0	1582.63	896.736		0	0	0
	0	1548.5	834.068		0	0	0
	0	1310.54	486.723		721.011	0	0
	0	1131.23	799.176		0	0	0
	0	2223.92	294.408		0	0	0
	0	1148.5	767.158		0	677.404	0
	0	1536.2	540.938		0	0	0
	0	0	667.136		180.286	0	0
	0	1264.42	759.05		0	0	0
	0	966.741	298.904		0	0	239.069
	0	1560.29	618.278		0	0	0
	0	672.262	195.071		0	0	0
	0	1181.33	415.441		0	0	0
	0	1312.73	306.689		0	0	0
	0	1002.12	490.602		0	529.423	0
	0	708.368	817.343		0	0	0
	0	1990.49	489.851		0	0	0
	0	1918.89	1067.24		0	0	0
	0	1034.16	890.166		0	0	0
	0	528.787	499.742		0	0	0
	0	0	152.49		0	0	0
	0	390.278	214.549		0	0	0
	0	0	473.106		0	0	0
	0	326.365	404.796		0	597.679	0
	0	840.894	862.311		457.368	0	0
	0	0	520.13		0	0	288.54
	0	0	241.961		0	0	0
	0	0	0		0	894.464	0
	0	419.801	1102.39		429.949	0	0
	0	289.658	1033.3		0	251.027	312.822
	0	25.1719	823.202		0	973.255	0
	0	0	499.594		0	329.74	604.291
	0	0	663.057		0	511.398	0
	0	0	599.364		0	0	306.919
	0	0	906.857		0	0	0
	0	465.506	587.564		0	0	321.279
	0	0	647.196		0	349.98	358.527
	0	328.037	608.587		0	1289.85	451.881
	0	0	576.406		0	0	0
	0	0	493.586		0	0	750.167
	0	0	431.77		0	0	0
	0	0	497.119		0	0	0
	1119.04	311.088	361.359		0	0	0
	0	0	274.769		200.968	0	0
	0	161.996	351.337		0	0	502.138
	0	0	435.865		0	0	0
	0	0	0		0	289.108	0
	0	287.845	501.497		0	0	0
	0	260.669	0		0	502.788	0
	0	0	144.308		0	0	0
	1095.29	0	684.067		0	0	0
	879.747	859.071	807.487		0	0	500.872
	0	0	844.306		0	0	0
	0	504.688	92.6622		179.302	0	0
	0	0	0		0	0	0
	0	0	721.933		0	303.678	0
	0	0	223.471		0	0	0
	690.464	0	219.419		0	0	695.524
	0	0	63.9649		0	0	0
	0	249.356	0		0	0	0
	0	0	511.093		0	151.28	0
	0	0	899.046		0	0	0
	0	0	384.485		0	259.755	0
	0	0	421.237		0	0	0
	598.712	920.951	927.071		0	415.952	0
	0	0	992.174		0	291.35	0
	0	0	668.038		0	428.847	0
	992.622	0	463.411		0	413.582	0
	0	97.4377	316.324		0	343.458	0
	1012.26	204.062	813.902		0	547.363	0
	0	0	1440.79		0	0	0
	670.012	1449.63	1118.16		467.744	0	0
	0	553.494	698.923		0	1191.76	0
	0	647.466	0		0	458.308	0
	0	0	293.968		0	272.914	0
	0	0	1660.94		0	519.802	1283.34
	0	0	551.525		0	0	484.202
	0	0	769.691		0	0	0
	0	0	1186.81		0	0	0
	0	0	620.608		0	0	0
	0	0	680.862		0	0	0
	0	0	801.651		0	0	0
	0	445.056	854.262		0	0	0
	0	0	824.394		0	0	0
	0	0	848.31		0	0	0
	0	0	610.249		0	0	0
	0	0	90.8885		442.057	0	0
	0	0	726.179		0	0	0
	0	0	605.903		0	0	0
	0	0	0		0	0	0
	410.14	0	628.038		0	0	0
	0	451.603	447.058		0	0	1135.16
	0	0	397.609		0	963.028	0
	0	0	173.809		0	0	0
	0	0	0		0	0	0
	368.855	0	0		0	0	0
	819.415	0	285.532		0	0	0
	0	0	130.919		0	0	0
	0	852.586	418.024		0	0	0
	546.046	1544.95	559.733		0	0	0
	675.662	951.475	617.321		0	0	0
	0	844.898	0		0	626.093	0
	0	681.54	1064.91		0	637.908	0
	0	1346.1	282.4		418.85	0	0
	0	954.364	336.349		0	0	0
	0	0	1145.8		0	1099.31	0
	0	1585.97	632.885		0	0	0
	1653.43	0	1304.22		0	0	0
	502.16	183.653	1104.44		0	0	0
	0	1630.97	620.346		0	0	0
	0	914.546	549.555		0	0	0
	955.044	159.177	718.715		233.355	0	0
	0	1276.71	1080.48		0	926.638	0
	0	1608.9	1083.05		0	173.905	0
	0	1079.99	1027.05		0	285.599	0
	0	2717.95	579.274		0	0	0
	320.899	1273.6	921.568		0	0	0
	0	944.074	386.854		0	0	0
	0	1053.62	848.392		0	0	0
	0	1250.33	508.45		0	0	0
	0	0	615.589		0	0	0
	0	1230.26	467.877		0	0	0
	0	96.8343	687.118		0	0	0
	0	700.417	0		0	0	0
	0	738.188	613.41		0	0	0
	1095.61	1335.94	479.586		0	262.725	0
	0	1276.22	0		0	0	0
	0	1048.71	670.755		0	0	0
	0	1455.18	188.377		0	0	0
	673.467	731.567	400.925		0	0	27.7
	0	0	0		0	448.145	0
	0	519.483	1291.32		0	0	0
	0	387.057	866.751		0	361.107	0
	0	1560.03	1099.42		0	0	0
	0	1060.13	308.046		0	126.736	405.316
	0	393.409	453.905		0	0	213.569
	0	1575.5	283.934		0	0	0
	0	2158.08	947.623		0	330.968	0
	853.501	426.776	101.002		0	392.276	0
	0	860.118	833.686		0	0	0
	0	683.083	1287.63		0	0	0
	0	941.963	372.281		0	0	0
	0	778.209	0		0	0	0
	0	992.176	482.05		468.218	0	0
	0	810.231	506.783		0	0	0
	0	1519.04	1064.38		0	0	0
	0	2165.21	411.906		0	0	0
	0	1199.64	914.059		0	0	0
	0	2401.6	1705.11		0	0	0
	0	818.79	91.4297		0	0	0
	0	268.011	0		0	0	73.2642
	0	0	1060.11		0	871.549	0
	690.428	0	501.718		0	0	0
	0	739.881	472.439		0	0	0
	0	0	261.875		0	0	754.439
	0	0	260.23		0	0	1280.96
	0	377.824	164.209		0	0	0
	0	0	213.961		0	0	0
	0	0	25.1475		0	0	0
	0	214.727	1147.83		0	0	0
	0	0	0		0	0	0
	0	0	786.573		689.502	0	271.328
	0	0	1200.39		0	0	0
	0	261.819	522.491		0	0	0
	0	244.616	701.281		0	0	285.359
	0	0	675.198		0	421.09	0
	0	354.192	685.586		0	0	476.376
	0	0	233.119		0	0	0
	0	0	545.723		0	0	0
	0	0	0		0	0	0
	0	0	831.408		0	0	0
	0	265.423	795.569		0	1143.16	0
	0	277.289	330.327		0	0	0
	0	0	279.331		0	0	0
	0	0	711.789		0	32.1614	0
	0	48.0934	241.147		0	0	0
	0	0	884.929		0	0	0
	0	0	847.624		0	0	0
	0	0	477.798		339.995	0	0
	0	0	446.708		270.705	0	992.139
	1010.91	0	0		0	0	0
	0	263.357	0		0	0	0
	0	0	921.349		0	0	0
	0	0	555.089		0	0	0
	0	301.513	858.583		0	0	0
	0	316.083	498.621		0	0	0
	0	328.825	1097.6		372.586	0	0
	0	0	0		0	0	0
	0	0	935.714		0	0	0
	0	0	814.5		0	0	0
	0	499.248	492.308		0	0	0
	0	0	903.992		0	0	0
	0	0	639.344		0	0	0
	0	0	167.587		0	0	0
	0	0	227.821		0	0	0
	0	376.588	528.421		0	0	0
	1323.42	0	608.032		0	0	0
	0	0	818.137		0	0	0
	0	0	499.728		688.247	0	0
	0	397.211	365.316		0	0	0
	0	392.797	207.954		0	0	0
	0	0	1176.76		0	0	0
	0	0	1250.01		0	0	0
	0	0	570.124		0	0	0
	0	0	703.089		0	0	0
	0	0	0		0	0	0
	0	0	717.591		0	0	0
	0	0	1080.72		0	0	0
	0	0	756.62		0	0	0
	0	0	324.725		0	0	0
	0	0	0		0	0	0
	1170.68	0	862.963		0	0	0
	0	0	1220.2		0	0	907.278
	0	0	760.358		0	0	0
	0	0	707.424		0	0	0
	0	0	756.352		0	0	0
	0	0	1461.83		0	0	0
	0	0	491.672		0	0	0
	0	0	256.6		0	0	0
	501.075	348.211	845.386		0	0	0
	0	0	796.306		0	0	0
	0	0	438.112		0	0	0
	1247.54	0	304.604		0	0	0
	0	0	1097.67		0	0	0
	0	0	742.524		0	1092.03	1404.13
	0	0	874.986		0	0	0
	0	0	619.926		0	0	0
	1372.25	0	883.113		0	1109.66	0
	0	697.392	793.525		0	0	0
	0	0	403.984		0	1139.06	0
	0	1097.7	767.743		0	0	0
	0	1955.1	464.018		518.803	0	0
	0	1333.9	170.076		0	841.433	0
	0	971.255	276.839		0	1727.18	0
	0	443.113	364.065		0	0	0
	0	0	196.615		0	0	796.889
	0	0	639.584		0	0	0
	0	0	279.442		0	0	0
	0	969.22	0		0	0	0
	0	0	221.225		0	0	0
	0	417.129	1094.2		0	0	0
	0	1179.53	0		0	1179.29	0
	0	0	536.666		0	0	0
	0	0	724.07		0	0	0
	0	1256.89	630.295		0	0	0
	0	825.166	565.174		0	0	0
	0	1262.18	0		0	0	0
	390.441	1995.04	557.708		0	0	0
	0	913.27	706.115		0	0	0
	0	1269.41	0		168.767	0	538.386
	0	960.925	277.07		0	290.525	0
	0	0	1572.48		0	0	0
	0	1792.86	311.639		0	453.801	0
	0	1564.7	0		0	0	0
	0	894.717	395.911		0	0	0
	1259.41	1410.78	759.974		0	331.467	0
	0	869.33	917.856		0	0	0
	0	2341.15	720.11		0	38.7725	0
	0	1462.03	178.05		358.14	408.782	251.293
	556.414	926.293	0		0	0	0
	0	717.935	0		643.942	0	0
	0	721.002	650.569		0	0	0
	0	1680.11	478.132		0	0	0
	0	357.328	396.594		0	0	529.802
	0	1404.71	1064.26		0	0	0
	0	1190	165.014		0	0	0
	877.913	795.458	498.492		126.335	0	0
	0	1160.49	367.32		0	278.428	0
	0	764.976	495.783		0	0	0
	0	2148.43	1240.42		0	0	0
	697.626	548.817	600.402		0	0	0
	0	1505.59	468.462		0	476.259	0
	0	1852.27	959.669		0	0	0
	0	1152.32	1397.49		0	0	0
	0	872.682	0		0	0	0
	0	1238.54	304.752		0	0	0
	1628.86	1065.45	0		532.856	774.748	0
	0	748.655	638.185		0	0	0
	0	1717.63	635.705		0	0	0
	0	398.996	651.055		0	917.198	138.497
	0	381.381	889.363		0	337.56	0
	0	0	0		0	0	0
	0	0	631.276		0	239.035	0
	0	331.393	0		0	0	0
	0	343.26	779.889		0	443.794	0
	0	0	641.259		445.947	0	0
	0	0	0		0	393.809	0
	0	0	0		0	0	0
	0	0	820.321		0	0	0
	539.082	567.624	546.824		95.7044	369.346	0
	0	0	0		0	0	0
	0	353.967	1614.47		0	0	0
	985.187	685.416	552.911		0	335.33	0
	0	0	481.804		0	0	0
	0	235.665	1316.27		0	831.559	0
	858.616	0	745.186		0	0	0
	0	0	895.738		0	0	0
	0	107.846	1581.94		0	1282.61	0
	0	0	214.421		0	0	739
	427.066	312.341	0		0	458.522	0
	0	250.24	804.309		0	347.264	0
	0	784.144	577.436		0	663.567	0
	0	260.941	0		0	0	0
	469.762	231.356	435.885		0	0	0
	1089.59	0	511.967		0	1034.02	700.566
	0	0	153.978		0	666.168	0
	0	0	415.247		0	0	0
	0	0	408.848		0	1084.95	0
	0	671.884	344.971		0	0	0
	0	314.075	0		0	0	0
	0	0	380.913		0	626.947	0
	0	0	230.374		0	0	0
	0	0	585.545		0	0	0
	0	0	440.146		0	0	334.172
	0	0	356.072		0	0	0
	0	0	238.123		0	0	0
	0	235.194	668.961		0	62.3738	0
	0	0	740.157		0	94.1623	0
	0	611.98	925.325		0	0	0
	665.689	0	162.835		0	1183.85	0
	0	0	1384.34		0	0	0
	0	339.266	473.552		0	0	0
	0	0	603.082		0	0	0
	0	0	465.021		352.527	497.26	0
	0	0	219.671		0	0	0
	0	686.221	760.549		0	547.182	0
	0	202.016	812.684		0	0	0
	0	362.254	789.502		435.208	0	0
	0	0	590.094		0	0	0
	0	0	160.783		0	0	0
	0	285.536	226.132		0	1221.34	0
	0	0	1227.93		0	0	0
	0	0	0		0	0	0
	0	0	255.675		0	0	0
	0	0	789.658		0	0	0
	0	0	630.76		0	413.43	0
	771.522	0	827.611		0	0	0
	0	0	0		0	0	0
	0	0	0		0	0	0
	0	166.75	1357.49		0	397.918	0
	0	0	190.831		0	612.436	877.379
	0	0	346.306		0	300.959	0
	0	0	624.084		289.187	677.704	1057.53
	0	0	430.991		0	0	0
	0	0	738.937		0	0	0
	0	0	820.395		528.511	0	0
	0	0	210.655		0	0	0
	0	0	744.889		0	0	0
	0	0	0		0	0	0
	0	0	754.073		0	0	0
	0	0	557.458		0	0	0
	0	0	763.861		0	0	0
	477.571	0	0		0	0	0
	0	0	487.669		0	0	0
	0	0	375.734		0	0	0
	0	791.85	367.566		0	0	0
	0	0	234.848		0	0	0
	0	0	1090.97		0	0	0
	0	0	361.135		0	0	0
	0	1391.86	198.876		0	329.7	0
	0	1161.96	553.393		0	0	0
	0	1182.45	617.21		0	0	0
	0	1239.38	547.936		0	0	0
	0	277.83	0		0	0	0
	0	749.353	536.739		0	0	0
	0	830.08	800.439		0	0	549.995
	0	0	714.776		0	0	0
	0	0	525.014		0	324.096	0
	0	726.002	338.183		0	0	0
	0	825.84	188.352		0	0	573.546
	0	24.6968	0		426.289	0	528.318
	738.253	659.515	1033.75		0	553.739	0
	0	1446.44	662.915		0	0	0
	0	1445.85	362.438		0	0	0
	0	1468.08	994.699		0	0	0
	0	1129.68	978.937		0	0	0
	0	1318.3	0		0	0	0
	0	1660.3	499.665		0	0	1033.14
	0	1170.86	644.628		0	0	0
	0	1046.67	683.858		0	0	0
	0	1010.69	791.895		0	145.611	0
	1456.69	821.66	182.915		0	0	0
	0	1070.81	546.321		397.467	0	0
	0	1188.43	777.063		0	0	0
	0	0	685.957		0	0	0
	0	1630.05	566.183		419.053	0	0
	0	774.442	737.169		0	0	0
	0	922.612	440.078		0	0	0
	0	132.821	252.479		0	0	277.344
	0	1299.67	892.853		0	0	0
	0	1036.82	200.989		0	0	0
	0	1948.71	0		0	0	0
	0	665.217	0		0	0	0
	0	886.103	1004.9		0	0	0
	0	996.172	231.627		0	0	0
	0	207.916	0		0	0	0
	0	1284.07	1673.19		0	0	0
	0	1434.95	406.851		0	0	269.627
	0	1552.27	604.345		0	0	0
	0	1585.56	683.938		0	0	0
	0	1521.34	265.671		0	0	0
	0	785.417	1017.39		0	398.631	0
	0	1565.8	0		0	0	0
	0	0	1300.59		401.3	0	0
	0	618.065	0		0	0	0
	0	981.81	1123.46		0	529.094	0
	0	715.406	458.751		0	0	0
	0	700.742	835.661		0	0	0
	0	192.937	0		0	0	0
	0	0	257.066		0	0	0
	0	382.161	404.445		0	0	1189.85
	0	0	773.328		567.855	0	0
	0	0	0		0	0	0
	0	0	923.412		0	0	0
	0	126.38	781.794		0	0	612.37
	0	0	687.332		0	0	0
	456.133	0	348.013		0	561.434	0
	0	0	172.111		0	0	0
	0	241.537	0		0	0	0
	0	311.652	914.851		0	0	0
	0	0	731.395		0	0	0
	0	503.472	677.872		0	0	526.345
	0	0	1165.62		0	0	0
	0	0	794.055		0	715.704	493.561
	0	364.027	1202.57		0	0	0
	0	0	0		0	0	0
	0	282.016	629.669		0	0	0
	0	468.204	856.009		0	0	0
	0	0	179.887		0	0	0
	0	0	678.801		0	0	0
	0	239.405	0		0	0	0
	0	0	939.138		0	0	0
	0	237.845	541.495		76.6084	0	0
	0	744.241	0		0	0	853.901
	674.653	276.535	1127.23		540.223	0	0
	0	370.542	659.29		0	0	0
	0	239.654	774.137		0	0	0
	0	0	521.239		0	0	0
	0	0	0		0	0	320.987
	732.633	0	245.026		0	0	1103.71
	0	0	1147.54		0	0	43.8603
	0	0	198.204		239.673	0	0
	925.364	0	492.512		0	0	0
	896.6	0	310.632		0	0	0
	0	0	894.662		0	0	0
	0	0	607.911		0	814.968	0
	0	0	974.95		0	0	0
	1211.57	0	980.897		346.484	0	0
	0	0	253.578		0	0	429.385
	0	222.452	890.155		0	343.465	0
	0	0	222.479		0	0	0
	0	0	170.573		0	0	0
	1666.85	0	688.344		0	0	0
	862.173	0	401.557		0	0	0
	0	0	976.138		0	0	0
	0	228.921	385.311		0	0	0
	0	399.747	1194.84		0	0	0
	579.186	0	0		0	0	0
	0	0	0		0	0	0
	0	824.132	787.468		0	0	0
	0	0	1548.09		0	0	0
	1158.49	437.761	759.859		0	0	0
	0	408.953	1030.31		0	0	0
	673.71	0	0		0	0	0
	1783.18	0	173.149		0	0	0
	0	0	0		0	662.609	601.866
	0	0	749.74		0	0	0
	544.803	0	613.236		0	0	0
	394.878	0	1212.46		64.6668	0	0
	0	0	0		0	0	0
	0	0	445.435		0	0	0
	0	0	0		0	0	0
	0	0	0		0	0	0
	0	0	0		0	0	0
	0	0	0		0	0	0
	0	0	668.571		0	0	0
	0	0	556.424		0	0	0
	0	0	1303.59		0	0	0
	0	0	1226.42		0	0	0
	0	0	0		604.426	0	0
	0	0	0		0	0	0
	0	0	774.857		0	0	0
	0	0	240.214		0	0	0
	0	0	558.931		0	0	0
	1155.69	0	557.575		0	593.029	0
	0	0	120.927		0	0	0
	0	420.704	195.467		0	0	1014.56
	289.873	357.234	0		0	0	0
	0	0	306.009		0	526.591	0
	0	2258.9	1715.4		0	0	793.07
	0	0	1176.34		0	0	0
	0	823.578	273.328		703.15	0	0
	0	1542.66	753.987		0	0	0
	0	661.109	606.398		0	828.522	0
	0	0	854.527		0	0	0
	0	255.263	595.407		0	396.612	0
	0	0	590.002		0	0	0
	754.001	1433.7	1565.13		0	0	0
	486.783	614.406	823.605		0	0	0
	584.479	771.551	440.562		0	0	0
	0	449.049	1121.76		0	0	0
	0	1609.66	376.168		0	0	632.183
	0	1753.72	230.724		582.327	0	0
	0	0	989.388		0	0	0
	0	2146.08	456.822		0	0	0
	0	711.307	0		0	202.819	0
	0	709.194	628.449		0	0	0
	0	0	441.181		0	0	0
	0	851.669	959.554		0	509.148	0
	0	2132.16	366.175		0	0	0
	0	632.533	410.382		0	0	0
	0	1552.01	773.533		0	0	0
	0	681.399	215.773		0	0	0
	0	1093.27	650.402		591.034	0	0
	0	1298.03	821.095		0	467.297	0
	0	425.722	603.118		0	0	0
	0	883.471	607.429		0	0	0
	554.83	761.703	331.349		0	0	0
	0	0	541.756		0	0	0
	0	386.158	311.629		0	577.098	0
	0	976.612	833.275		0	0	0
	0	481.344	546.295		0	929.078	0
	0	653.281	0		0	0	0
	0	450.074	395.188		0	0	0
	0	0	366.086		0	0	0
	0	1143.85	470.547		0	363.919	0
	0	1029.18	185.349		0	577.352	0
	0	1337.9	223.646		544.283	0	0
	0	0	491.172		0	0	0
	0	246.756	1312.85		0	0	0
	0	1157.88	603.467		0	0	0
	0	686.288	239.286		0	0	0
	0	896.706	240.224		0	433.364	0
	0	334.278	0		0	0	0
	0	1228.87	0		0	0	0
	0	658.101	0		0	0	0
	0	861.168	0		0	0	0
	0	0	261.553		0	0	0
	0	0	591.516		0	0	0
	0	477.265	600.399		0	0	297.99
	0	0	329.439		0	0	528.264
	0	0	0		0	0	0
	0	222.032	701.036		0	0	0
	0	0	917.394		0	653.823	0
	0	259.047	320.626		366.959	0	0
	0	0	536.332		0	0	0
	0	0	0		0	0	601.094
	0	647.258	501.169		0	0	0
	0	368.208	0		0	713.273	0
	0	0	545.15		443.799	0	0
	0	277.163	332.667		0	1393.97	0
	0	0	202.044		0	0	0
	0	0	0		0	343.146	0
	0	328.273	456.157		0	0	0
	0	0	155.433		0	0	0
	0	0	678.483		0	0	0
	0	0	1036.99		0	0	0
	935.68	0	1001.01		0	0	382.694
	0	0	379.944		0	0	1020.53
	0	0	255.092		0	0	0
	0	356.84	0		0	0	373.464
	0	0	1152.95		0	601.555	0
	0	0	991.785		0	250.142	0
	0	0	660.897		0	0	0
	0	0	1013.18		0	520.395	0
	0	238.185	0		0	0	0
	870.713	0	1335.61		0	405.852	0
	0	0	0		0	449.014	0
	0	992.263	781.295		0	330.198	0
	1416.39	0	692.685		0	385.434	0
	0	0	617.71		0	0	0
	0	0	0		0	0	0
	0	0	385.779		0	0	0
	0	0	0		0	0	0
	0	0	481.365		0	0	0
	0	0	0		0	810.148	431.4
	0	540.302	263.171		0	0	0
	0	348.103	610.975		0	0	0
	0	0	462.254		0	0	0
	0	0	236.482		0	0	0
	0	0	267.383		0	0	0
	0	0	904.496		456.006	0	0
	0	0	190.036		0	0	0
	0	0	446.692		0	0	0
	0	282.19	0		0	0	0
	0	218.232	360.08		0	0	0
	0	320.282	580.528		0	0	0
	0	568.135	784.77		0	0	0
	0	0	365.965		0	0	0
	0	0	403.118		0	0	0
	0	425.704	0		0	0	0
	0	0	604.039		0	0	0
	0	0	0		0	0	0
	0	0	590.933		0	0	0
	0	0	706.418		0	0	0
	0	0	0		0	0	0
	0	0	610.884		0	600.837	0
	0	0	0		0	0	0
	0	0	1703.8		0	0	0
	0	0	623.305		0	297.489	0
	0	0	0		0	0	0
	0	0	914.575		0	0	0
	0	0	222.29		0	0	0
	0	0	343.76		0	0	0
	0	0	430.263		0	0	0
	0	0	0		0	0	0
	0	0	859.684		0	0	0
	0	0	873.28		0	0	0
	0	0	749.752		0	0	0
	0	0	1238.33		0	0	0
	0	0	777.237		0	0	0
	0	1298.64	956.588		0	0	0
	0	0	1185.47		0	0	0
	0	0	0		0	0	0
	0	0	574.16		0	0	0
	0	466.624	1160.29		0	0	0
	0	0	782.454		0	0	0
	0	723.625	896.33		0	0	0
	0	1450.94	128.537		0	0	0
	0	0	492.16		0	0	0
	0	532.761	0		0	0	0
	0	904.508	664.797		0	0	0
	0	1613.28	316.363		710.354	0	0
	0	1387.15	462.072		0	0	0
	0	1237.01	1632.75		0	0	0
	0	1895.14	0		0	0	0
	0	1085.59	323.526		0	0	0
	0	1396.47	661.515		0	0	0
	0	1368.64	758.441		0	0	0
	1103.79	1146.49	510.449		0	0	0
	0	487.606	0		0	0	0
	0	0	423.947		0	0	0
	0	1589.51	910.385		0	0	0
	0	984.249	367.321		0	0	0
	0	819.662	555.627		0	0	0
	1047.82	2006.47	0		0	0	0
	0	713.232	705.893		0	0	0
	0	1219.33	712.907		0	0	612.33
	0	117.663	144.911		0	0	0
	0	1397.93	915.394		0	0	0
	0	1013.46	891.841		0	0	0
	0	2209.42	119.176		0	0	0
	0	178.014	0		0	0	0
	0	289.288	401.649		0	0	0
	0	613.736	394.952		0	0	0
	573.672	638.21	0		0	0	0
	566.663	0	277.87		0	0	0
	0	701.828	0		0	0	0
	0	317.531	304.925		0	0	0
	0	866.454	437.302		0	0	0
	0	977.901	418.559		0	0	0
	0	226.073	813.613		0	0	0
	0	0	177.747		0	0	181.747
	0	760.738	243.305		0	0	0
	0	1633.36	583.687		0	0	0
	1081.36	1843.5	268.124		0	0	0
	0	548.835	0		0	490.923	0
	0	220.792	454.997		0	0	0
	0	1258.69	135.024		0	0	0
	0	1880.82	664.186		0	0	0
	0	1424.07	315.608		0	0	0
	0	754.029	448.921		0	0	0
	0	605.321	0		0	0	0
	0	421.077	219.351		0	0	0
	0	677.01	635.131		0	0	462.939
	0	833.726	415.752		0	0	0
	0	490.255	611.473		0	0	0
	0	0	411.386		0	0	0
	0	0	790.012		0	0	777.965
	0	0	729.694		0	0	2156.52
	0	0	134.928		0	0	854.132
	0	258.452	0		0	0	953.504
	0	0	618.899		0	1207.05	638.894
	0	0	263.001		0	0	0
	1657.88	0	477.783		0	0	410.28
	1172.52	292.112	861.017		0	0	0
	0	166.385	203.638		0	0	0
	825.647	489.111	97.9917		0	0	0
	0	227.924	750.219		0	0	0
	0	225.307	129.663		0	0	0
	0	266.803	1366.85		0	0	0
	0	352.678	828.184		0	0	382.94
	0	0	0		0	0	0
	0	0	695.518		0	0	455.14
	0	484.706	1041.06		475.043	0	0
	0	0	1010.55		0	0	0
	774.801	0	558.063		0	0	0
	1944.14	0	0		0	0	0
	638.734	0	895.556		514.293	0	428.319
	0	891.194	409.494		0	0	0
	0	0	230.531		0	0	782.818
	0	0	1073.14		0	0	0
	0	0	0		0	0	0
	0	0	0		0	0	0
	0	0	625.607		0	0	0
	0	982.602	0		0	0	0
	0	0	0		0	0	530.472
	0	269.96	371.574		713.066	0	0
	0	219.458	300.323		0	0	0
	443.704	0	0		0	0	0
	0	0	251.457		0	0	0
	759.251	232.682	168.081		0	543.098	0
	647.867	233.999	932.524		0	0	0
	0	0	228.609		0	318.674	0
	0	736.824	369.069		0	0	0
	0	170.321	1084.26		0	0	0
	0	0	968.719		0	0	0
	0	0	973.609		0	0	0
	0	0	721.901		0	589.457	0
	0	0	1513.31		0	0	0
	0	0	296.205		0	0	0
	0	0	604.29		0	0	0
	0	0	872.756		0	251.576	0
	0	0	0		0	0	0
	0	0	232.365		0	0	0
	0	0	687.261		0	0	0
	0	0	0		0	0	0
	0	0	372.588		0	0	0
	0	0	471.839		0	0	1888.49
	0	0	558.115		0	0	0
	0	0	1029.27		0	0	0
	0	0	309.223		0	0	0
	0	0	323.825		0	0	0
	0	0	0		0	0	0
	0	0	555.67		0	0	0
	0	0	0		0	0	0
	0	0	0		0	0	0
	0	0	620.111		0	0	0
	0	0	181.107		0	0	0
	0	0	134.876		0	610.156	0
	0	0	0		0	0	0
	0	0	0		0	343.626	0
	0	0	199.24		0	0	0
	0	0	476.827		0	891.007	0
	0	0	271.395		0	906.82	0
	0	0	211.2		0	0	0
	0	0	0		0	302.969	0
	0	534.608	0		0	0	0
	0	561.698	438.126		0	0	0
	0	0	498.541		1247.09	0	0
	0	0	266.616		0	316.973	0
	0	0	1660.56		0	0	0
	0	0	1009.49		657.174	784.122	0
	0	1282.44	730.204		586.559	0	0
	0	1179.93	676.938		0	474.124	0
	0	2205.1	0		0	725.144	0
	0	1131.87	208.544		0	0	0
	0	586.62	360.826		0	0	0
	0	1504.7	1864.94		0	0	0
	0	0	1062.11		0	0	0
	0	1395.74	0		0	857.237	0
	0	1119.62	420.881		0	1060.88	0
	0	1352.66	710.594		0	0	0
	0	0	290.009		0	0	0
	0	850.107	570.16		0	0	0
	0	1088.22	523.209		0	1487.76	0
	0	1259.17	1088.31		0	0	0
	0	1054.74	114.776		0	0	0
	0	1040.17	0		0	0	0
	0	0	633.674		571.521	518.916	0
	0	1012.64	239.218		0	0	0
	0	0	71.0547		0	0	0
	1061.12	1170.85	0		0	0	0
	0	1440.36	0		0	0	0
	0	797.73	472.378		0	0	0
	0	217.937	0		0	0	0
	0	1253.24	496.638		0	0	0
	0	508.215	1074.78		0	0	0
	0	327.47	329.141		0	0	0
	0	603.002	0		0	0	0
	0	497.835	0		0	505.23	0
	0	1327.7	652.348		430.709	0	0
	0	615.29	662.058		0	0	0
	0	1701.55	799.308		0	267.099	0
	0	0	829.232		0	579.314	0
	0	1552.74	750.616		0	846.824	537.835
	0	678.282	262.063		0	0	0
	0	0	920.897		0	533.168	0
	0	2005.81	342.136		0	0	0
	0	233.624	248.167		0	213.782	0
	0	740.99	0		0	0	0
	0	821.919	1149.07		0	0	0
	0	1483.42	263.088		0	0	0
	0	961.957	0		454.841	0	0
	0	879.33	161.225		0	0	0
	0	616.759	265.119		0	0	0
	0	371.285	994.788		229.092	0	0
	0	272.228	828.753		0	0	0
	0	306.195	834.567		0	0	0
	0	1377.9	248.867		0	0	0
	0	1400.01	879.666		0	200.645	0
	0	1148.7	745.796		0	0	0
	0	1136.83	604.728		0	582.038	0
	0	951.168	359.49		0	0	0
	0	63.0985	184.305		0	529.818	0
	0	271.527	513.288		0	0	0
	0	0	1419.69		0	0	0
	0	0	221.089		0	0	0
	0	0	593.502		639.882	0	0
	0	285.008	464.374		0	314.784	634.096
	0	0	244.662		0	0	1093.6
	0	98.3713	0		0	0	0
	0	65.2563	859.063		0	172.392	0
	0	437.597	399.513		0	351.099	0
	0	309.554	253.341		0	0	0
	0	569.812	979.584		0	0	0
	0	0	0		0	0	0
	0	0	0		0	0	0
	0	0	860.906		0	0	0
	0	0	909.429		0	0	0
	0	0	145.417		0	0	0
	0	0	418.031		0	0	0
	0	0	930.485		0	0	317.967
	0	0	0		0	0	0
	0	610.134	674.998		0	0	0
	414.048	0	382.013		0	0	0
	941.818	351.08	875.353		0	0	0
	500.927	0	241.479		0	0	355.43
	0	431.162	495.656		0	0	0
	0	0	0		0	0	0
	0	0	0		0	367.971	0
	0	674.84	558.644		0	0	0
	0	0	446.998		0	0	0
	0	0	900.433		0	0	0
	0	0	0		0	0	368.833
	0	284.381	0		0	0	670.952
	0	0	635.298		0	0	0
	514.885	0	981.816		0	0	0
	0	0	0		0	0	0
	0	0	320.79		0	0	0
	0	0	0		0	0	0
	0	0	368.123		360.07	0	149.841
	0	0	0		0	0	0
	433.35	0	615.772		0	0	0
	0	0	0		0	0	0
	268.183	0	0		0	0	0
	0	0	1213.67		0	0	0
	506.416	0	773.378		0	0	0
	0	191.099	313.226		0	0	570.974
	0	0	0		0	0	0
	0	0	0		0	0	0
	0	0	254.875		0	0	0
	0	0	399.448		0	0	0
	0	661.589	612.338		0	0	0
	0	0	911.178		0	0	0
	0	0	1055.26		0	0	0
	0	372.772	916.928		0	0	0
	0	213.13	549.418		535.131	0	854.611
	0	0	943.54		0	0	0
	624.307	0	567.881		0	0	0
	991.345	0	558.686		0	0	0
	0	158.667	558.8		0	0	803.349
	0	0	199.217		0	0	0
	0	0	358.82		0	0	0
	0	0	0		0	0	0
	0	0	228.899		0	0	0
	0	0	1599.34		0	0	0
	491.701	0	330.144		0	0	0
	0	0	1070.77		0	0	0
	0	0	0		0	0	1291.03
	0	0	224.123		0	0	0
	0	0	0		0	0	0
	0	0	735.255		0	0	0
	0	0	479.041		0	0	0
	0	0	578.769		0	0	0
	0	1068.55	885.259		0	0	0
	0	0	678.327		448.979	0	0
	0	0	742.087		0	0	0
	0	1199.55	1047.44		500.676	0	1481.82
	0	0	0		0	0	0
	1050.53	0	0		0	0	0
	0	0	0		48.7087	0	0
	0	0	1145.43		0	0	0
	0	1279.59	782.974		0	0	0
	0	865.909	412.039		0	0	0
	0	534.128	402.322		0	0	0
	0	0	981.91		0	0	0
	1077.95	0	728.555		0	0	0
	0	1431.79	413.593		0	0	0
	0	837.122	883.824		0	0	0
	0	64.5005	0		0	0	0
	0	404.843	993.203		0	0	0
	0	883.142	814.426		0	0	0
	0	792.449	668.703		0	0	0
	655.216	1473.61	285.481		0	0	0
	0	1250.88	800.486		0	0	0
	0	0	1149.46		0	0	0
	0	0	294.585		0	0	0
	785.66	305.808	0		0	0	139.165
	0	1035.46	602.186		0	0	0
	0	780.129	1385.07		0	0	0
	0	1638.5	0		0	0	0
	0	665.475	248.183		0	0	0
	0	1620.19	484.244		0	0	0
	0	387.562	430.502		0	0	298.427
	0	1316.27	383.977		0	0	0
	0	1046.84	434.608		0	0	546.669
	0	1614.89	634.272		0	0	0
	0	0	165.915		0	0	0
	0	1445.54	280.351		0	0	362.957
	0	1461.55	392.38		0	0	0
	740.532	1077.66	684.472		0	0	308.782
	0	1114.05	295.41		0	0	0
	0	300.278	1000.27		0	0	0
	0	517.141	0		0	0	0
	0	621.629	415.667		0	0	0
	0	957.103	284.926		0	0	0
	0	462.872	1224.59		0	0	0
	0	913.638	791.196		0	0	0
	0	0	1287.84		0	0	0
	0	1004.63	0		0	0	0
	0	516.182	559.565		0	0	0
	0	1380.99	615.151		0	0	191.676
	0	462.637	277.791		0	1103.45	0
	0	1106.39	0		0	0	0
	0	771.137	623.521		0	0	0
	0	1181.11	1510.48		0	0	0
	0	1768.24	630.928		0	2389.73	0
	0	0	553.496		0	0	0
	541.287	1334.56	673.324		0	0	0
	0	1526.59	542.87		0	0	0
	0	640.058	282.907		0	0	0
	0	1103.28	0		0	850.609	0
	0	394.588	932.924		537.462	0	0
	0	0	307.014		0	0	0
	0	214.941	462.587		0	605.21	0
	0	0	1185.34		0	436.945	0
	0	0	276.17		0	0	0
	0	0	223.227		0	0	0
	0	0	291.917		0	0	0
	0	0	659.405		0	0	0
	0	319.173	0		0	0	0
	0	292.439	357.567		0	0	0
	0	241.771	412.44		0	764.809	0
	0	548.228	0		0	559.728	0
	0	237.617	149.841		0	0	0
	0	0	0		0	1164.2	0
	0	926.851	758.249		0	0	0
	0	0	0		0	0	348.22
	0	604.465	544.448		0	0	0
	0	0	1233.48		0	0	0
	0	0	332.176		0	0	118.908
	0	0	0		0	597.898	0
	0	0	133.734		0	0	0
	0	485.229	0		0	536.72	0
	0	0	0		0	0	0
	881.953	0	600.619		0	0	0
	0	0	1455.63		0	0	0
	0	0	956.871		0	0	557.357
	0	282.12	1103.79		0	574.713	0
	0	280.841	0		0	481.344	0
	0	0	444.952		0	0	0
	0	0	235.154		0	0	0
	0	471.648	424.108		0	0	0
	0	711.084	525.641		0	0	0
	0	0	263.601		0	0	0
	0	0	445.373		0	0	0
	0	0	453.143		0	0	0
	0	0	895.043		0	0	0
	0	0	297.791		0	0	0
	0	308.374	288.947		0	0	0
	0	0	0		0	0	0
	0	0	448.095		0	0	0
	0	0	338.815		0	595.922	0
	0	0	0		0	584.1	0
	0	300.848	1460.76		0	0	0
	0	0	479.038		0	0	0
	0	0	897.324		0	1169.11	0
	0	0	0		0	0	0
	0	0	687.315		0	0	0
	0	0	827.845		0	0	0
	0	132.618	0		0	0	0
	0	0	588.663		0	0	0
	0	267.893	832.018		0	265.464	0
	0	388.715	615.041		0	0	0
	0	0	1117.36		0	0	0
	0	0	0		0	0	0
	0	0	804.673		0	0	0
	0	442.924	99.6938		0	638.776	0
	0	0	342.617		0	0	0
	0	0	840.1		0	0	0
	0	0	0		0	0	0
	0	0	625.28		0	1006.24	0
	0	0	0		0	1004.26	0
	0	0	0		0	0	0
	0	0	311.932		0	0	0
	0	1098.1	0		0	0	0
	0	0	0		0	421.07	0
	1054.58	0	1079.59		0	0	0
	0	0	1156.62		0	0	0
	0	0	926.95		0	0	0
	0	0	679.623		0	0	0
	0	0	1811.96		0	595.899	721.262
	0	0	0		0	0	0
	0	0	226.3		0	0	0
	0	0	0		0	0	0
	0	0	737.322		0	754.848	0
	0	0	900.447		0	0	0
	0	0	458.407		0	757.433	0
	0	664.211	561.851		0	0	0
	0	0	0		0	0	0
	0	0	0		0	0	0
	0	1038.92	548.765		0	0	0
	0	0	645.173		0	321.645	0
	0	1473.39	677.579		0	0	0
	0	568.962	649.937		0	814.117	0
	88.5929	206.62	367.378		0	0	0
	426.409	1276	375.139		0	347.197	0
	0	2028.25	703.631		0	1009.09	0
	0	706.191	436.86		0	0	0
	0	677.39	648.135		0	0	0
	0	1030.49	374.38		0	0	0
	0	578.549	997.814		0	418.109	0
	0	351.338	1131.38		0	0	864.9
	0	1914.15	317.571		0	0	452.197
	0	307.328	1161.21		0	0	0
	0	908.893	1332.76		0	0	0
	759.294	430.289	0		97.2173	185.171	0
	0	1356.51	722.892		0	282.897	0
	0	1004.09	561.558		0	839.144	0
	1522.31	1629.66	198.085		0	0	0
	0	985.586	509.535		0	0	0
	0	1053.47	0		0	0	0
	0	1705.03	366.256		0	316.157	0
	0	1374.55	475.531		0	0	0
	0	1319.87	400.98		0	0	0
	0	669.014	207.463		0	0	0
	1080.14	0	553.806		0	0	429.182
	0	761.158	663.931		0	0	0
	0	1817.74	314.964		0	0	0
	0	581.544	921.495		0	0	0
	1132.21	0	231.174		0	0	0
	0	972.962	582.614		0	0	0
	0	883.887	0		0	0	0
	0	0	168.214		0	0	0
	0	381.945	1378.44		0	0	0
	0	377.763	815.654		0	0	0
	0	2766.51	0		0	0	0
	0	664.124	0		0	0	267.39
	0	0	438.811		0	0	0
	0	962.502	442.484		0	0	0
	0	764.598	782.412		0	0	0
	0	694.523	0		0	0	186.247
	0	1954.93	970.854		0	0	0
	0	1405.18	1157.69		0	0	0
	473.738	1501.59	895.506		520.062	0	0
	0	765.819	401.623		0	0	0
	0	237.39	0		0	0	0
	0	1657.19	436.622		512.679	0	0
	0	1095.58	599.802		0	0	0
	0	611.313	1283.81		0	0	0
	0	958.815	1011.49		0	0	0
	0	0	1355.18		0	0	0
	0	0	35.086		0	0	0
	0	0	0		0	0	0
	0	409.27	653.442		0	865.967	0
	583.778	0	735.342		0	292.591	0
	1645.15	0	1023.54		0	0	0
	0	0	1026.96		0	0	0
	0	0	0		0	0	0
	0	0	764.104		0	0	0
	0	969.761	450.49		0	0	0
	0	0	340.337		0	0	0
	0	0	375.65		0	0	597.319
	0	369.764	0		0	0	0
	0	0	468.626		0	0	0
	0	0	387.115		0	0	0
	598.353	0	378.362		0	0	0
	638.479	0	0		0	0	0
	0	0	0		0	0	0
	0	0	371.427		0	0	0
	0	0	533.98		0	0	0
	0	0	857.593		0	0	0
	0	759.694	335.965		0	0	0
	794.706	0	1289.67		0	0	0
	1035.53	0	1354.55		0	0	758.709
	0	0	834.756		0	0	0
	0	0	213.743		0	0	0
	0	0	0		0	0	0
	0	0	0		0	0	0
	0	285.721	0		413.427	0	416.832
	615.243	0	358.867		0	0	546.108
	0	649.577	538.576		0	0	649.487
	0	385.602	479.024		0	0	606.904
	0	0	0		320.288	0	559.699
	0	349.08	514.773		0	847.62	0
	0	0	0		0	0	0
	0	0	341.797		0	550.093	0
	0	394.991	917.063		0	0	0
	0	0	310.791		0	368.353	0
	0	675.26	0		0	0	316.508
	0	0	322.342		0	0	0
	0	269.341	410.114		0	0	0
	0	0	478.94		0	0	0
	0	331.695	345.203		388.244	0	0
	0	464.802	1609.8		0	0	0
	0	0	230.007		0	0	0
	0	837.359	614.595		0	0	0
	597.111	0	174.94		0	0	0
	0	0	319.682		0	0	0
	0	0	551.65		0	0	0
	0	0	495.706		0	0	0
	0	0	0		0	0	0
	0	370.661	99.6695		0	0	0
	0	593.492	0		0	0	0
	0	0	693.561		0	0	0
	0	0	364.377		0	0	0
	0	0	935.493		0	0	0
	0	0	361.323		0	0	0
	0	0	422.972		0	0	0
	0	0	445.576		321.805	0	0
	0	680.63	293.273		0	0	0
	0	0	0		0	0	0
	0	567.539	525.915		0	0	0
	0	0	946.888		0	0	0
	0	0	376.396		0	0	0
	0	0	658.339		0	0	0
	0	0	675.293		0	0	0
	0	0	919.148		0	0	0
	0	0	0		0	654.591	376.47
	0	0	0		0	0	0
	637.075	0	0		0	887.007	0
	0	0	504.184		0	0	0
	0	0	226.428		0	0	0
	0	0	651.206		0	0	0
	0	0	195.852		0	0	0
	0	0	1452.28		0	0	0
	0	0	990.449		0	0	0
	0	0	325.154		513.233	0	0
	0	222.972	926.432		0	0	0
	0	616.043	0		0	0	0
	0	434.16	1090.33		0	0	0
	0	0	411.114		0	0	0
	0	0	0		0	0	0
	0	208.708	465.238		0	0	0
	0	244.56	325.162		0	0	0
	0	0	0		0	0	0
	0	0	838.41		0	0	0
	0	0	314.215		0	0	0
	0	1817.51	691.129		0	0	0
	0	666.443	1205.99		0	811.493	0
	0	1494.3	345.385		0	0	0
	0	862.568	350.947		60.3141	0	0
	0	832.783	193.879		0	0	0
	0	841.287	0		0	0	0
	0	849.129	1123.59		0	0	0
	0	0	493.124		0	0	0
	0	1283.74	921.941		0	0	0
	0	786.316	326.111		0	550.087	0
	0	1270.07	669.585		705.964	0	0
	0	416.422	0		0	0	0
	0	866.519	530.903		0	0	0
	0	551.932	438.283		0	132.872	0
	0	0	209.825		0	577.735	0
	0	660.461	532.641		0	0	0
	0	797.72	539.368		0	250.698	0
	0	3215.65	880.634		0	0	0
	0	785.77	244.084		0	0	0
	0	0	192.009		0	0	0
	0	1015.4	0		0	0	0
	0	1302.24	792.956		0	0	0
	0	1212.72	779.831		0	0	0
	0	821.554	194.884		0	0	0
	0	1187.43	456.011		0	293.81	0
	0	532.941	505.944		0	0	0
	0	715.609	0		0	0	0
	0	1311.57	174.825		0	0	374.503
	0	0	437.837		0	0	0
	0	1682.37	457.075		0	0	0
	0	1149.34	515.571		0	0	0
	0	1162.16	0		406.557	0	0
	0	158.305	331.149		0	402.285	0
	0	1623.93	359.396		0	0	0
	0	1649.89	620.669		0	643.892	0
	0	636.588	669.216		0	0	0
	0	1964.51	1483.11		0	445.672	0
	0	195.179	889.108		0	0	0
	0	1403.28	470.916		0	0	759.149
	0	154.711	621.194		0	0	0
	0	1386.98	1182.05		0	0	0
	0	578.913	974.325		0	0	0
	0	148.44	599.471		0	0	0
	0	83.1557	714.732		0	504.279	0
	0	0	929.652		0	0	0
	0	217.436	764.075		0	0	0
	0	278.889	574.747		0	708.474	0
	0	0	501.742		0	0	0
	1220.92	0	301.331		0	0	0
	0	217.885	392.102		0	452.492	276.151
	0	0	292.263		0	0	0
	1133.73	0	484.832		0	0	0
	0	216.461	331.83		0	1012.28	0
	0	0	1049.05		0	0	0
	0	0	713.617		0	355.995	915.193
	0	29.6739	0		0	363.295	0
	0	251.555	944.735		0	857.314	0
	0	0	542.134		0	0	0
	0	381.542	251.448		0	0	0
	0	203.334	704.644		0	0	0
	0	0	477.001		0	360.859	301.379
	669.607	0	1449.35		0	0	0
	0	0	691.601		0	0	0
	0	168.359	0		0	0	667.658
	1595	0	395.342		489.351	273.036	0
	0	0	705.695		0	421.766	0
	0	0	478.634		0	0	0
	0	0	209.744		0	1229.53	0
	0	0	314.131		0	0	0
	0	348.318	432.362		0	0	0
	0	0	465.665		0	0	0
	0	0	404.577		0	39.2391	422.287
	0	0	0		0	0	361.557
	109.143	0	0		0	0	0
	0	318.286	331.742		0	0	228.643
	0	0	0		0	0	0
	0	0	747.038		0	335.607	0
	0	182.564	0		0	0	0
	0	0	1284.35		0	284.263	0
	0	0	284.715		0	521.055	0
	0	484.356	193.037		0	0	0
	0	0	140.185		0	0	0
	0	402.738	852.469		0	410.664	0
	0	0	1073.31		0	864.501	0
	0	287.019	364.755		0	500.567	0
	0	0	557.618		0	0	0
	0	0	143.149		620.708	0	0
	0	0	387.334		0	0	0
	806.705	490.876	177.785		0	884.259	0
	647.824	0	300.718		0	378.102	0
	0	0	482.325		0	0	0
	0	0	0		0	1649.84	0
	0	423.931	240.827		0	0	0
	0	0	0		0	0	0
	0	0	709.846		572.288	0	0
	0	0	0		0	0	0
	0	637.343	413.019		0	1186.47	710.602
	0	0	708.595		0	841.683	0
	0	524.426	0		0	0	0
	0	1218.85	0		0	249.858	0
	0	0	581.866		0	0	0
	0	0	0		0	622.972	0
	599.402	0	1560.15		0	0	0
	0	0	252.427		0	0	1228.63
	0	0	738.053		0	263.032	0
	0	0	1561.11		0	350.609	0
	0	1014.79	0		0	823.501	0
	0	0	0		386.986	0	0
	0	0	977.679		0	439.901	0
	0	0	229.915		0	0	0
	0	0	0		0	0	0
	1430.5	0	503.355		0	0	0
	0	0	468.127		0	454.64	0
	0	800.108	901.319		0	0	0
	0	0	1217.06		0	0	0
	630.957	0	0		0	0	0
	1045.44	0	595.745		0	0	0
	0	0	1040.99		0	0	0
	0	1383.23	506.343		0	0	0
	0	0	362.472		0	0	436.148
	0	1180.18	986.123		0	0	0
	0	0	217.165		0	0	0
	0	510.237	600.355		0	0	0
	0	249.348	0		0	0	0
	0	765.884	0		0	0	0
	0	1138.33	0		0	0	0
	0	2009.45	661.791		0	0	0
	0	1312.09	1075.37		0	0	0
	0	212.891	486.222		0	467.862	0
	0	0	1165.05		0	0	0
	0	635.566	295.354		0	0	0
	0	1248.92	221.22		0	0	0
	0	818.828	1694.42		0	0	0
	0	366.896	0		0	0	0
	0	1334.61	0		0	462.604	0
	0	0	317.216		0	0	0
	0	1939.96	576.254		0	0	0
	0	1044.05	0		0	0	0
	0	1676.28	0		0	0	0
	0	1239.32	1421.24		0	0	0
	0	1069.17	410.988		0	0	0
	0	912.403	656.092		0	0	0
	0	482.227	766.833		0	0	0
	0	2446.66	947.8		0	0	0
	0	0	134.39		0	0	0
	0	1168.44	0		0	0	0
	0	620.212	1145.51		0	0	0
	0	1231.12	1894.09		0	0	121.609
	0	659.175	0		239.101	0	0
	0	1307.42	940.257		0	0	273.76
	0	1245.36	454.635		0	0	0
	0	846.964	435.615		0	0	0
	0	902.041	330.71		0	0	0
	0	0	224.442		0	0	0
	0	318.19	1301.01		0	0	0
	0	1137.17	403.523		0	0	0
	0	132.345	0		0	0	261.912
	0	98.5727	0		0	0	0
	0	0	248.213		0	0	0
	0	1146.72	675.616		0	0	0
	0	883.027	558.712		350.472	0	0
	0	1985.64	461.883		0	0	348.434
	0	547.867	588.539		0	0	0
	0	1654.87	367.296		0	1026.88	0
	0	1311.92	871.973		0	0	0
	0	1872.96	639.39		0	0	0
	0	0	1483.6		0	0	696.116
	0	457.898	0		0	0	660.877
	0	1202.85	530.213		0	0	487.949
	0	539.04	0		0	0	737.305
	0	1272.04	320.079		0	0	0
	0	1097.94	0		0	0	596.252
	0	282.996	0		0	0	0
	0	697.522	1444.74		0	0	0
	0	0	0		0	0	219.641
	0	0	1351.89		0	0	0
	0	402.585	0		0	0	0
	0	226.927	439.806		0	0	0
	0	0	849.477		0	0	0
	0	0	1185.17		0	0	0
	0	383.807	0		0	0	0
	0	471.581	753.039		0	0	0
	0	366.044	1631.12		0	0	250.611
	0	0	377.184		0	0	151.046
	0	264.03	309.947		0	0	0
	0	0	733.118		0	0	0
	0	566.439	285.434		0	0	0
	0	397.772	200.071		0	0	0
	0	338.399	1109.97		0	0	0
	0	549.603	663.942		0	596.633	148.782
	0	0	948.646		0	0	0
	0	451.414	590.085		0	0	0
	0	0	644.393		0	0	0
	0	303.443	1040.56		0	0	0
	0	363.853	970.189		0	0	0
	0	0	642.693		0	0	0
	0	223.237	0		0	0	0
	0	338.579	483.611		0	0	0
	0	0	390.243		0	0	0
	0	0	0		0	0	0
	0	0	743.565		0	0	535.034
	0	0	617.162		0	0	0
	0	0	1385		0	0	0
	0	0	1160.49		0	0	0
	0	0	458.972		0	0	0
	0	0	599.599		0	0	0
	0	0	0		0	0	0
	0	0	694.824		0	0	0
	0	0	404.299		0	0	584.093
	0	204.302	610.595		0	721.083	0
	0	246.498	231.962		0	0	0
	0	0	218.001		0	0	0
	0	306.016	552.022		0	0	0
	0	355.359	448.08		0	0	0
	0	0	0		0	0	0
	0	0	775.333		0	0	0
	0	0	794.223		0	86.7677	0
	0	0	0		0	0	0
	0	0	327.868		0	0	0
	0	0	325.84		0	0	0
	0	0	0		0	422.156	0
	0	0	557.956		0	0	0
	0	0	0		0	0	0
	0	283.514	0		0	0	0
	0	0	0		291.706	0	0
	0	635.409	682.131		0	0	0
	0	0	946.891		0	0	0
	0	0	281.895		0	0	0
	0	0	0		0	0	0
	0	761.669	152.307		0	0	0
	0	544.257	0		0	0	0
	0	0	819.901		0	0	0
	0	0	813.612		0	0	0
	0	0	267.608		0	0	0
	0	0	723.631		0	1936.3	0
	0	0	1022.95		0	0	0
	0	0	1009.66		0	0	0
	0	0	1043.62		0	0	0
	0	0	579.761		0	0	0
	0	1223.62	614.314		0	0	0
	0	0	559.82		0	0	0
	0	0	739.661		0	0	0
	0	0	0		0	0	0
	0	0	0		0	322.053	0
	0	0	361.168		0	0	0
	0	0	384.472		0	0	0
	0	0	701.555		0	464.951	0
	0	0	650.7		0	0	0
	0	0	0		0	0	0
	0	0	0		0	520.101	0
	0	485.098	0		0	373.376	0
	337.841	56.9614	0		0	0	0
	0	312.905	739.517		0	0	0
	0	1089.45	1249.99		0	0	0
	0	1775.1	1021.02		0	773.145	0
	0	0	731.096		0	0	0
	0	0	930.316		0	560.485	0
	0	1115.4	0		0	0	0
	0	580.781	1641.05		0	0	557.128
	0	482.686	282.595		0	0	0
	0	625.433	1137		0	680.847	0
	0	0	0		0	0	0
	0	792.356	0		0	0	0
	0	693.607	1009.76		0	631.39	0
	0	820.45	1135.73		0	0	0
	0	1446.09	0		0	558.296	0
	0	1089.51	0		0	925.218	0
	651.261	1891.97	0		0	0	0
	0	1839.03	1149.36		0	0	0
	0	827.001	0		0	0	0
	0	0	387.187		0	0	0
	0	217.921	416.144		0	0	0
	0	0	1258.51		0	667.886	0
	0	415.273	97.1425		0	378.717	457.801
	0	827.865	804.302		0	0	0
	0	714.276	586.706		0	458.637	209.86
	0	890.551	649.898		0	0	0
	0	2224.38	0		0	248.98	160.411
	0	1015.86	1086.85		0	0	0
	0	1168.19	0		246.242	847.461	0
	0	1215.48	0		0	0	0
	0	799.302	1103.45		0	0	0
	0	0	510.086		0	498.809	0
	0	1256.12	566.157		0	0	0
	0	1739.78	648.465		0	627.296	397.508
	0	582.63	840.187		0	766.968	0
	0	705.034	319.376		0	0	0
	0	872.216	887.419		0	1720.43	0
	954.31	1213.7	694.281		0	0	0
	0	1098.4	271.652		747.694	372.582	0
	733.546	1382.57	820.361		0	0	0
	0	1099.96	0		0	1221.58	554.968
	0	831.037	619.237		0	0	0
	0	1164.77	960.481		0	0	0
	0	350.424	506.194		0	242.911	0
	353.555	640.634	0		0	0	0
	0	1255.16	0		0	42.2744	0
	0	921.416	0		0	0	327.349
	241.736	0	899.915		0	360.332	709.386
	0	729.699	453.083		0	383.549	0
	971.164	762.224	842.468		0	0	0
	802.624	0	528.165		0	0	0
	0	495.249	851.24		0	0	0
	0	161.903	652.502		0	0	0
	588.666	257.499	0		0	0	0
	0	0	487.387		0	0	0
	0	0	643.712		0	0	0
	0	0	0		0	0	0
	1400.28	0	432.645		0	1086.88	361.622
	0	0	363.826		0	0	0
	0	342.994	0		0	0	0
	0	0	632.525		0	304.827	0
	0	0	656.304		0	0	0
	0	0	1532.45		0	0	0
	0	0	0		0	1429.29	393.68
	0	0	0		0	0	171.065
	0	0	819.296		0	561.377	0
	0	0	295.217		0	147.764	0
	0	748.832	0		0	0	0
	0	678.503	1871.45		0	0	0
	0	0	0		0	0	0
	0	0	232.158		61.9067	1028.67	0
	0	0	159.744		0	0	471.252
	0	0	549.009		0	0	0
	0	0	280.287		0	0	0
	0	0	444.548		0	0	0
	0	0	571.601		0	320.7	0
	0	0	246.059		0	535.61	0
	0	225.595	343.898		0	0	0
	0	355.193	668.344		0	34.4333	0
	0	0	374.68		0	483.08	0
	0	323.6	680.936		0	711.95	0
	347.97	0	197.192		0	358.889	0
	0	0	153.314		0	0	0
	0	314.155	922.971		0	1074.43	0
	0	0	597.143		276.851	0	0
	0	378.284	657.767		0	0	0
	0	0	202.518		0	0	0
	0	307.765	0		0	0	0
	0	628.979	341.18		0	0	0
	0	0	1091.96		0	0	0
	0	270.704	556.244		0	291.203	0
	0	246.207	0		0	0	0
	0	0	1252.31		0	590.445	0
	0	0	0		0	0	0
	0	229.271	725.745		0	0	0
	0	286.648	102.051		0	0	0
	0	0	0		0	0	0
	0	0	0		0	0	0
	0	0	592.661		0	0	0
	0	0	0		0	0	0
	0	0	0		0	463.495	0
	0	0	268.347		0	0	0
	0	0	0		0	0	0
	823.038	0	880.604		0	0	0
	0	0	790.284		474.431	0	0
	0	0	0		0	0	0
	0	0	583.661		0	354.7	0
	0	0	0		0	0	0
	0	0	510.927		0	289.844	0
	0	0	363.692		0	0	0
	901.39	0	0		0	0	0
	0	0	363.162		0	0	0
	0	0	208.867		0	0	0
	0	0	305.017		0	0	0
	0	0	1035.67		0	0	0
	0	0	794.139		0	0	0
	0	0	321.641		0	0	0
	0	0	284.875		0	0	0
	0	741.77	0		0	0	0
	0	0	1115.15		253.977	0	0
	0	523.7	0		120.331	0	0
	0	0	618.637		0	320.981	0
	0	0	500.637		0	0	0
	0	0	786.755		0	0	0
	0	721.553	0		0	0	0
	0	0	324.627		0	0	0
	0	0	374.46		0	0	610.996
	0	597.769	725.751		0	0	0
	0	0	914.677		0	0	0
	0	0	0		0	0	0
	0	326.454	746.667		0	0	848.774
	0	0	0		373.962	410.427	0
	0	865.009	846.226		0	0	0
	0	0	1246.37		0	0	0
	0	679.805	542.153		567.216	0	0
	0	359.67	615.423		0	0	0
	0	1387.86	445.261		0	0	0
	0	2535.21	1092.53		0	0	0
	0	1216.78	352.814		0	0	0
	0	0	257.768		0	0	0
	0	974.728	0		0	0	0
	0	533.14	489.075		0	0	1010.23
	0	1590.04	704.655		0	0	0
	0	1287	726.199		0	0	0
	0	1726.06	489.061		0	0	0
	0	0	0		0	0	0
	0	936.4	0		0	511.214	0
	0	176.788	0		0	0	0
	0	323.837	1017.13		0	0	0
	0	424.995	835.146		0	0	166.722
	0	0	276.714		0	0	0
	0	998.163	1281.51		525.254	0	0
	0	930.394	178.949		0	0	0
	0	912.657	708.217		0	0	0
	0	505.731	0		0	0	0
	0	1398.69	0		0	0	0
	0	1516.34	783.22		0	0	0
	0	740.154	635.038		0	0	0
	0	660.855	414.563		0	0	0
	0	286.929	0		0	0	0
	0	1601.67	0		0	0	0
	0	814.522	0		0	0	220.725
	0	1028.65	0		0	0	0
	0	1393.4	0		0	0	0
	0	976.808	920.068		0	0	0
	0	711.219	1115.78		0	0	0
	0	515.678	571.56		0	0	0
	0	594.749	854.01		0	0	0
	0	375.612	1047.86		0	0	0
	0	1892.47	1154.47		0	0	0
	0	90.1266	609.172		0	0	0
	0	1458.68	669.407		0	0	0
	0	852.882	0		0	0	0
	0	628.404	1428.16		0	0	0
	0	2188.01	1041.23		0	0	0
	0	1864.42	896.521		0	599.538	0
	0	0	574.522		0	0	0
	0	1323	716.882		0	0	0
	0	1147.13	0		0	0	0
	0	0	413.406		0	0	0
	0	333.184	0		0	0	0
	0	599.751	336.45		0	0	0
	0	0	1658.94		0	0	0
	0	368.868	1738.63		0	0	255.258
	0	0	308.619		0	0	0
	0	0	435.51		0	0	0
	0	207.738	0		0	0	0
	0	0	1423.63		0	0	0
	0	234.754	722.543		0	0	0
	752.52	0	170.507		416.427	0	0
	0	0	562.257		0	0	0
	0	0	396.087		0	0	365.197
	0	0	329.309		0	0	0
	0	0	794.607		0	0	339.06
	0	0	572.565		0	0	0
	0	0	931.677		0	0	0
	393.833	0	146.702		0	0	0
	0	0	1008.73		0	0	0
	0	0	237.428		0	0	325.634
	0	233.673	770.94		0	0	0
	0	0	0		0	0	0
	1121.72	0	1576.15		0	0	0
	0	0	399.195		415.52	0	599.936
	0	0	1159.96		0	0	0
	0	0	355.41		0	0	0
	0	0	445.504		0	0	0
	0	0	272.55		0	0	0
	0	0	358.117		0	0	0
	0	0	0		0	0	0
	0	0	308.575		0	0	0
	0	483.68	964.481		0	0	0
	0	0	591.475		0	0	0
	0	0	987.01		0	0	340.463
	0	320.208	1260.24		0	849.647	0
	0	160.101	344.86		0	0	0
	0	0	0		0	0	0
	1372.74	195.81	0		0	0	0
	0	0	670.079		0	0	0
	0	347.565	444.155		0	609.544	973.661
	0	0	1021.76		0	0	0
	0	272.75	274.583		0	0	0
	0	0	1143.98		0	0	0
	0	0	569.258		0	0	0
	0	448.599	1702.63		0	0	0
	0	0	0		0	194.537	0
	0	461.403	475.889		0	0	0
	0	0	0		0	0	0
	0	281.338	0		0	632.138	664.626
	1001.83	164.37	1231.25		0	0	0
	0	0	724.359		0	0	1324.86
	259.149	0	183.502		0	535.532	0
	0	0	406.205		0	0	0
	0	0	410.733		0	512.531	0
	0	587.956	1430.14		0	0	0
	0	0	771.534		0	0	1360.23
	0	0	606.676		0	0	0
	0	0	652.206		0	0	0
	0	1479.39	389.36		0	0	0
	0	0	0		0	504.325	0
	0	0	1577.13		0	0	0
	0	1053.82	903.207		0	0	0
	0	0	0		0	0	0
	0	0	810.984		0	0	0
	0	0	529.358		0	0	0
	0	0	491.988		0	0	0
	0	0	912.58		0	0	0
	0	0	251.927		0	0	0
	0	0	497.978		0	0	0
	0	0	269.455		0	314.348	0
	0	0	0		0	0	0
	0	0	0		0	0	0
	0	1652.67	0		0	0	0
	0	0	0		0	0	0
	0	0	1113.36		0	0	0
	0	908.323	905.458		0	0	0
	0	0	0		0	0	0
	0	737.867	745.093		915.014	740.632	0
	0	843.191	249.519		0	866.218	0
	0	0	1117.42		0	592.339	0
	0	670.244	0		0	0	0
	0	1135.35	0		0	0	0
	0	874.927	0		0	0	0
	0	617.138	0		0	0	0
	0	613.88	471.112		0	0	0
	0	1677.58	357.394		0	600.039	0
	0	531.159	970.83		0	1054.38	0
	0	1133.85	0		0	1013.58	0
	0	0	2639.49		0	0	0
	0	707.804	880.914		0	789.68	0
	0	840.012	939.699		0	652.772	0
	0	921.287	0		0	0	0
	0	945.455	882.335		0	0	0
	0	579.099	1038.4		0	341.102	382.848
	0	0	420.361		0	0	0
	0	389.269	337.959		0	0	0
	0	0	0		0	0	0
	0	845.196	0		0	0	481.948
	0	869.79	906.318		0	0	0
	0	1647.42	244.835		0	0	0
	0	1490.17	1559.43		0	0	0
	0	937.041	742.511		0	0	484.778
	0	586.512	1144.98		0	0	0
	0	739.231	0		0	0	0
	0	0	286.912		0	94.0696	0
	0	2759.26	379.551		0	0	0
	0	1827.01	911.231		0	0	0
	0	1229.01	926.76		0	308.518	0
	0	1460.4	0		0	0	0
	0	1011.62	1488.96		575.232	657.037	0
	0	1526.86	737.828		0	0	0
	0	1056.56	0		584.888	0	0
	0	0	646.493		0	906.507	0
	0	265.473	220.783		0	0	0
	0	246.956	0		0	0	0
	0	0	0		0	392.977	0
	0	511.132	1145.09		0	0	0
	0	481.565	0		0	0	0
	0	306.611	0		0	0	0
	0	655.558	0		0	0	0
	917.524	1513.15	0		0	0	196.809
	0	0	571.086		0	569.263	0
	0	1121.61	0		0	0	0
	0	767.063	265.152		0	847.301	0
	0	0	0		0	0	0
	0	810.436	0		0	0	0
	0	389.449	374.001		0	0	0
	0	905.219	0		0	0	0
	0	1203.97	680.909		0	365.058	0
	0	468.378	501.378		0	0	252.643
	0	1005.9	0		0	673.611	0
	0	336.216	1073.71		0	0	0
	0	0	1399.28		0	0	0
	0	0	987.216		0	0	0
	0	525.523	0		0	0	0
	0	0	2119.42		0	0	378.353
	0	0	0		0	0	0
	0	0	1460.57		0	0	0
	0	254.799	533.37		0	0	0
	0	0	556.023		0	0	0
	0	0	0		0	0	0
	0	0	870.193		0	407.425	0
	1722.5	0	1182.1		0	0	636.773
	0	291.191	591.309		0	0	0
	0	0	1200.44		386.435	0	0
	0	0	575.675		0	0	0
	0	0	849.781		0	0	0
	0	284.147	0		0	0	365.155
	0	0	468.374		0	304.602	0
	0	0	385.668		0	0	0
	0	0	698.885		0	591.209	0
	0	0	345.794		0	0	0
	0	0	362.534		0	569.534	0
	0	0	0		0	0	0
	0	0	0		451.248	0	738.593
	0	0	426.705		0	0	0
	0	485.267	785.433		0	0	0
	0	0	0		0	0	0
	0	0	0		0	0	0
	0	0	633.459		0	0	0
	0	0	986.703		655.486	0	0
	0	0	778.878		0	0	0
	0	0	63.2829		0	0	0
	0	0	488.478		0	0	0
	0	0	580.809		0	0	0
	0	0	0		0	0	507.32
	0	304.518	657.61		308.117	0	0
	0	0	323.894		0	0	0
	0	0	0		0	0	0
	0	0	0		0	0	0
	0	0	0		0	566.32	0
	0	0	97.1226		0	0	0
	0	282.312	351.931		0	0	0
	0	0	0		0	0	0
	0	171.872	0		0	0	0
	0	0	449.071		0	0	0
	0	0	411.466		0	0	0
	0	0	144.947		0	0	0
	0	980.865	292.093		0	0	0
	0	0	0		0	0	0
	0	451	0		578.822	0	0
	0	307.401	298.795		0	0	0
	0	0	796.385		0	651.441	0
	0	0	361.769		0	0	0
	0	0	182.263		0	0	0
	0	0	1876.51		0	560.844	0
	0	0	722.648		0	0	0
	0	944.161	314.786		0	0	0
	0	0	450.572		0	0	0
	0	0	0		0	0	0
	0	0	0		0	0	0
	0	0	542.115		822.048	0	0
	0	0	0		0	0	0
	0	0	0		0	0	435.363
	0	0	0		0	0	0
	0	0	1793.6		0	0	0
	0	0	426.489		0	217.254	0
	0	0	0		0	0	0
	1623.44	0	1300.53		0	0	0
	0	0	571.132		0	0	0
	0	808.483	695.682		0	0	0
	0	0	281.379		0	0	0
	0	0	1407.89		0	0	0
	0	0	438.121		0	0	0
	0	0	1159.79		0	0	0
	0	0	0		0	0	0
	0	1422.51	1012.71		0	0	0
	0	0	0		30.0107	0	0
	0	1025.24	411.746		0	0	0
	0	755.302	441.91		0	0	0
	0	988.356	229.632		0	0	0
	0	932.833	593.602		0	0	0
	0	633.055	346.235		0	0	0
	0	841.054	246.705		0	0	0
	0	476.211	625.423		0	0	0
	0	145.981	298.726		0	0	0
	0	637.783	0		0	0	0
	0	990.427	0		0	0	0
	0	0	339.976		0	0	0
	0	0	467.348		0	0	0
	0	604.881	215.199		0	0	0
	883.579	545.691	495.201		0	0	0
	769.413	0	603.537		0	0	0
	0	201.522	0		0	0	0
	0	0	718.579		0	0	0
	0	340.576	0		0	0	0
	0	584.906	659.32		0	0	383.599
	0	246.765	271.734		0	0	0
	0	973.495	421.608		0	0	0
	0	616.669	213.678		0	0	345.516
	0	924.272	864.558		0	0	0
	0	572.956	931.99		0	0	0
	1484.87	913.928	841.388		484.274	0	0
	0	0	431.489		0	0	0
	0	803.63	1025.56		0	0	0
	0	542.286	556.277		0	0	0
	0	1015.43	0		0	0	0
	0	0	557.629		0	0	0
	0	1225.63	940.337		0	0	0
	0	1781.64	388.357		0	0	0
	0	0	375.917		0	0	435.63
	0	2326.02	857.309		0	0	0
	0	260.444	263.157		0	0	0
	0	1246.41	1038.13		0	0	0
	0	1026.36	592.236		0	0	0
	0	598.653	0		0	0	0
	0	416.175	0		0	0	0
	0	1706.39	0		0	1164.39	0
	0	1115.87	0		0	0	0
	0	898.47	990.622		0	0	0
	0	588.75	0		0	0	0
	0	555.128	352.772		0	0	0
	0	1476.91	261.715		0	0	0
	862.428	598.427	712.533		0	0	0
	0	0	327.008		0	0	0
	0	2641.64	1333.14		0	0	0
	0	1983.67	350.252		0	0	0
	0	0	0		0	0	0
	0	0	215.287		0	0	0
	0	337.577	731.057		0	0	0
	0	0	491.453		0	1191.75	191.971
	0	0	802.571		0	0	0
	0	0	1094.64		0	0	0
	0	0	714.778		0	0	366.515
	0	296.57	0		0	0	0
	0	0	541.075		0	148.705	0
	0	0	973.103		0	0	0
	0	0	198.615		0	0	0
	0	0	1344.07		0	0	0
	0	0	196.22		0	0	0
	1123.23	0	0		719.193	268.63	0
	0	0	421.951		0	0	0
	0	0	0		0	0	0
	0	0	379.688		0	0	0
	0	0	605.459		0	0	0
	0	305.995	527.287		0	0	0
	0	0	2269.73		0	0	0
	0	0	331.388		0	0	0
	0	0	0		0	0	0
	0	0	951.836		825.076	0	0
	0	0	529.022		0	0	0
	0	547.121	867.466		0	0	0
	0	0	1343.95		0	0	0
	0	0	846.629		0	0	0
	0	0	943.489		0	0	0
	0	392.842	0		0	0	0
	0	0	1933.41		0	0	0
	0	0	695.073		0	0	0
	0	286.338	0		0	0	0
	0	0	790.714		0	611.496	0
	0	896.623	742.987		0	451.453	0
	0	339.321	628.315		0	0	0
	0	0	520.469		0	0	0
	0	0	899.635		0	0	0
	0	0	204.585		0	414.843	0
	0	0	0		0	0	0
	0	0	463.44		0	696.419	0
	0	258.698	0		0	0	593.477
	1420.9	233.28	0		0	0	0
	0	0	770.68		0	0	0
	0	67.822	488.459		0	0	0
	0	0	0		0	178.385	0
	0	539.355	501.96		0	0	0
	0	0	0		0	0	433.404
	0	208	827.248		0	0	0
	0	0	1062.95		449.54	0	0
	0	0	753.68		0	0	0
	0	502.913	858.749		0	0	0
	0	0	281.493		0	0	0
	0	706.571	0		0	0	0
	0	0	828.66		0	0	0
	0	0	146.553		0	0	942.524
	0	713.906	0		0	0	0
	0	0	46.6082		0	0	0
	0	0	0		0	0	0
	0	2226.57	600.668		0	0	0
	0	0	0		0	395.192	0
	0	0	590.984		0	790.89	0
	0	0	0		0	0	0
[truncated: 59,160 more rows]
